# Supplementary material for: Plant AtEH/Pan1 proteins drive autophagosome formation at ER-PM contact sites with actin and endocytic machinery
Source: PubMed Central journal article supplement (PMC6853982; doi:10.1038/s41467-019-12782-6), 2019-11-13
Supplement: 41467_2019_12782_MOESM1_ESM.pdf [file 41467_2019_12782_MOESM1_ESM.pdf]

**Plant AtEH/Pan1 proteins drive autophagosome formation at ER-PM contact sites with actin and endocytic machinery.**

Wang and Pleskot et al., Supplementary information.

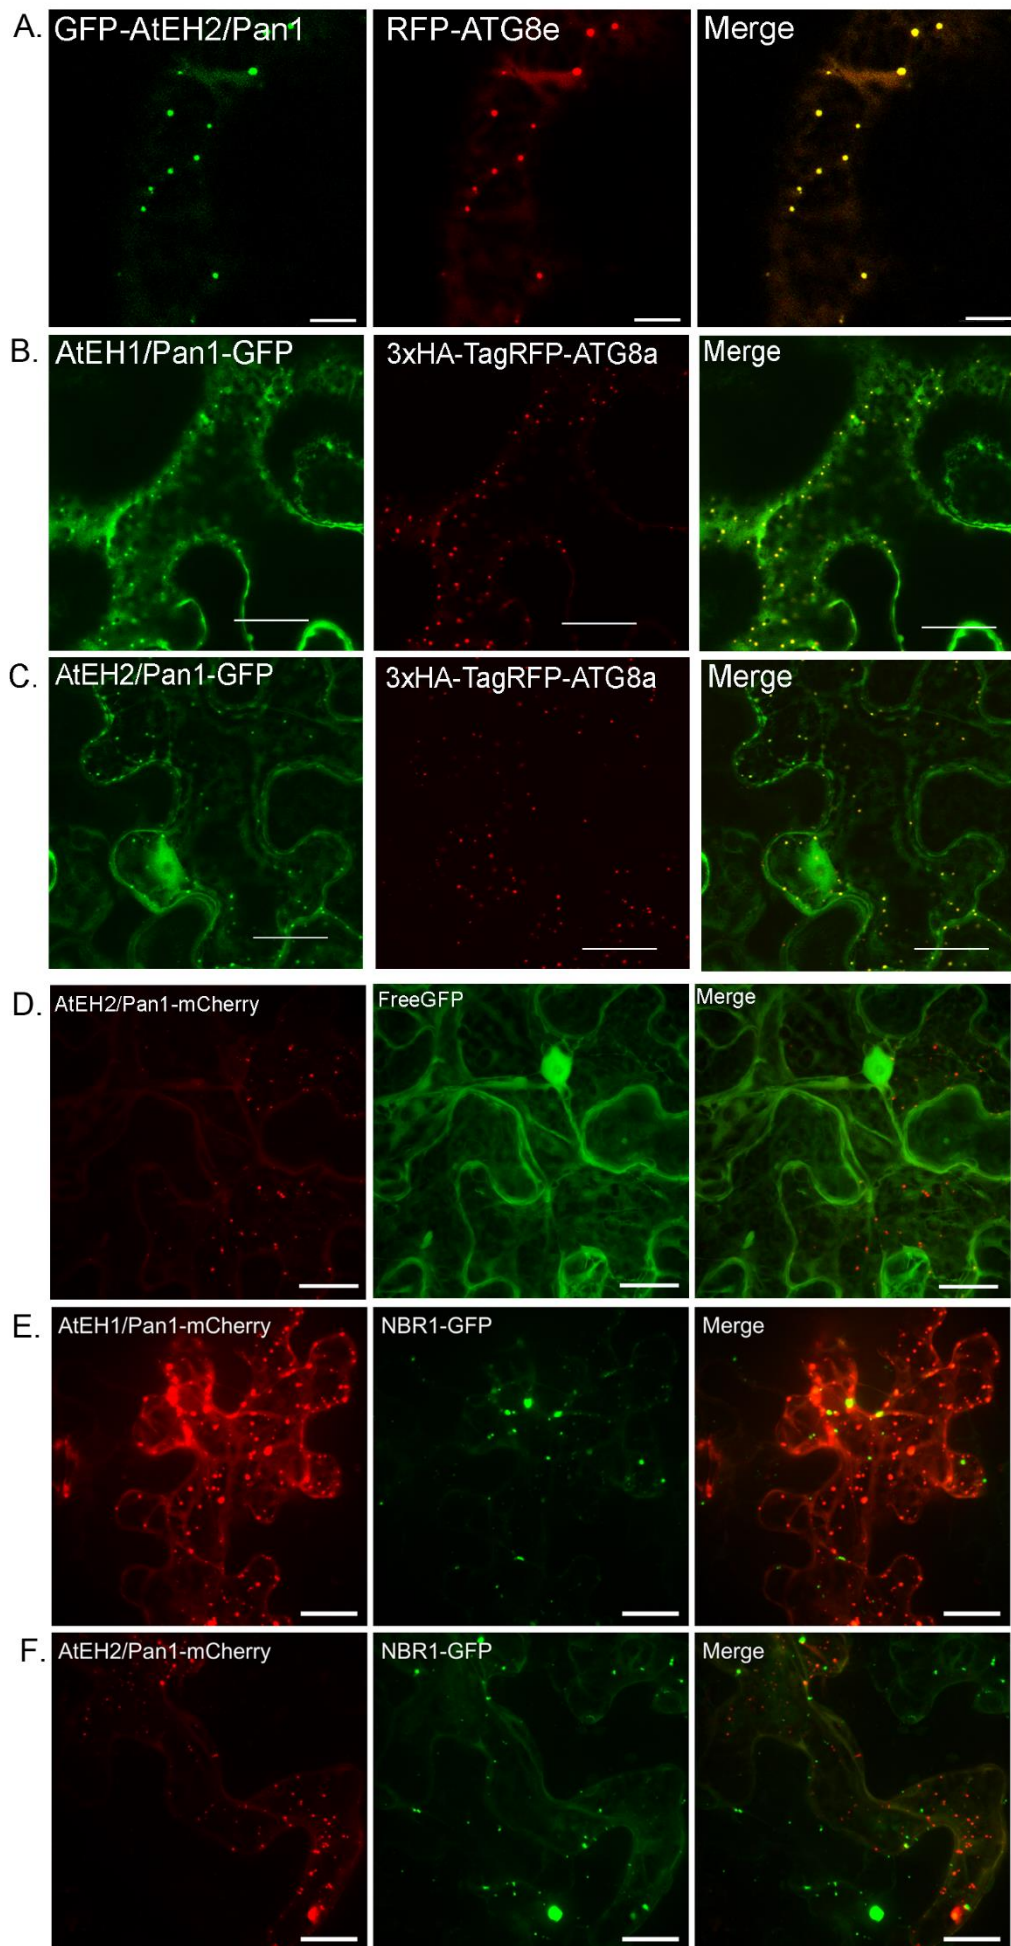

**Supplementary Figure 1. AtEH/Pan1 co-localizes with autophagosome markers in epidermal *N. benthamiana* epidermal cells.** **A.** Similar to AtEH1/Pan1, RFP-AtEH2/Pan1 co-localizes with the autophagosome marker, ATG8 in transient expression assays in *N. benthamiana* (Scalebars equal 10  $\mu$ m). **B-C.** Both AtEH1/Pan1-GFP and AtEH2/Pan1-GFP co-localize with ATG8 at autophagosomes, indicating that both N- or C- terminal GFP fusions do not affect the protein localization. **D.** As a control, AtEH2/Pan1-mCherry was co-expressed with cytosolic GFP, and no recruitment of free GFP into the autophagosomes was identified. **E and F.** NBR1-GFP, a marker that labels ubiquitinated cargo and aggresomes, co-expression with both AtEH/Pan1 proteins resulted in partial co-localization with AtEH1/Pan1-GFP (E), whereas hardly any co-localization with AtEH2/Pan1-GFP could be observed (F), indicating differences between both proteins (Scalebars equal 20  $\mu$ m).

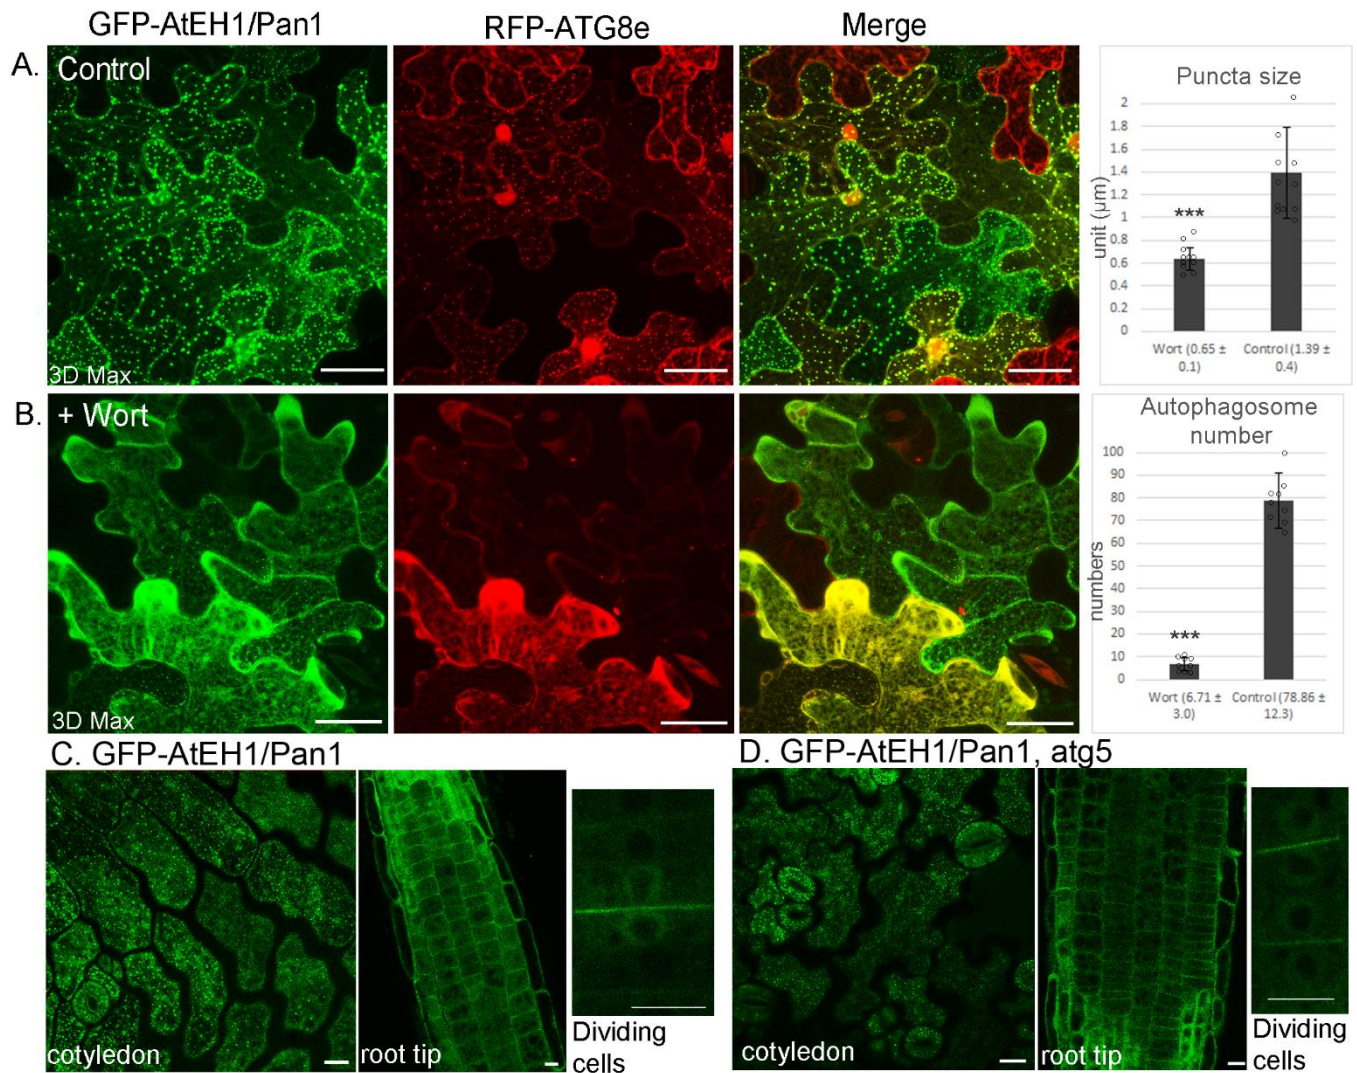

**Supplementary Figure 2. Drug treatments of GFP-AtEH1/Pan1 expressing cells, further confirm its localization to autophagosomes. A and B.** Wortmannin, a PI3K blocker that inhibits autophagy, treatment reduces the number of autophagosomes (calculated as a number of ATG8e-labelled punctae) and affects the size of the GFP-AtEH1/Pan1 punctae (measured from an area of 50 x 50μm, n=10). **C and D.** The GFP-AtEH1/Pan1 localization in either wild type Arabidopsis (*Col-0*) or in the autophagy deficient mutant *atg5*, is similar, i.e. punctate-labelling in cotyledons and PM-labelling in roots (also see Figure2), indicating that the localization of AtEH1/Pan1 is independent of the autophagy machinery (Scalebars equal 10 μm). Error bars are S.D, \*\*\*P < 0.001 in Student's T-test.

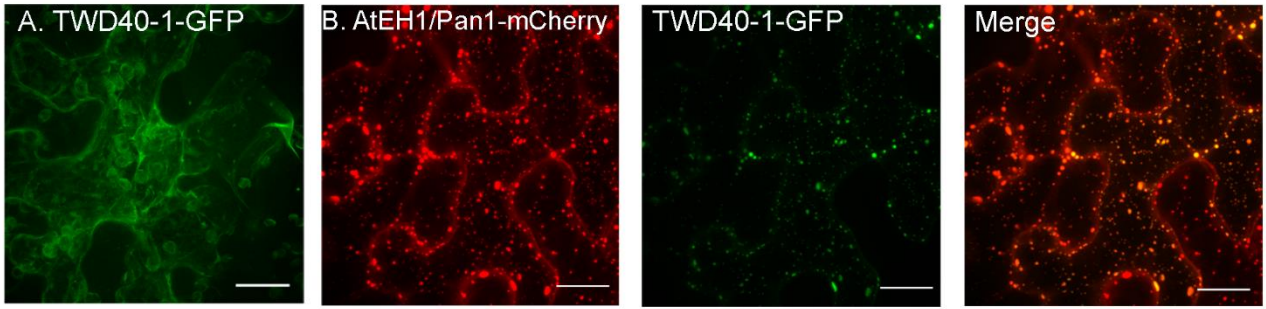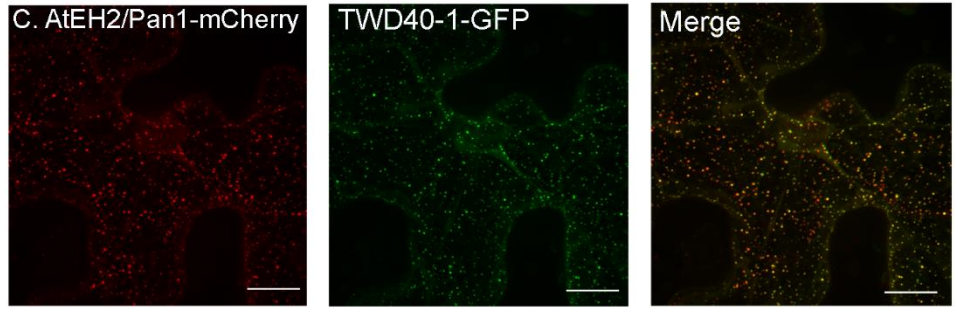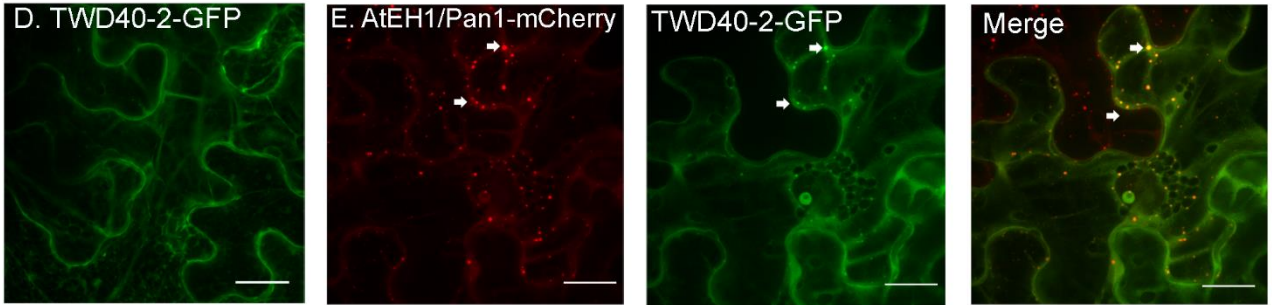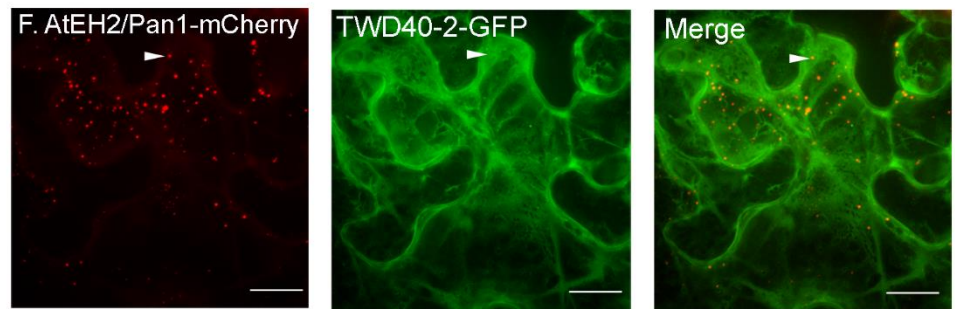

**G.**  
**EH1/Pan1-mCherry**

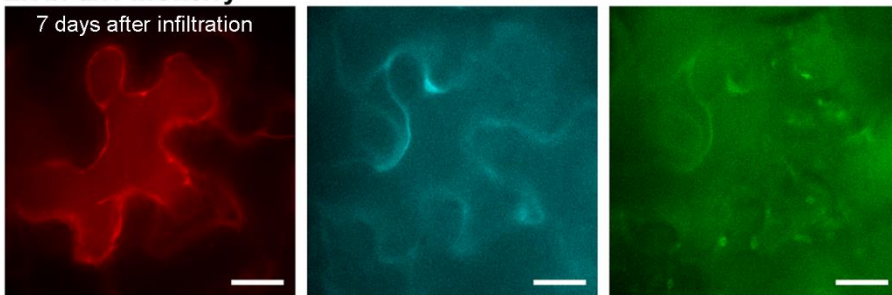

**EH2/Pan1-mCherry**

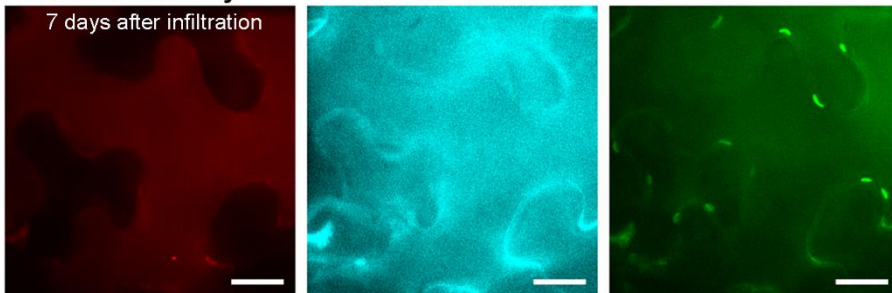

**H.**

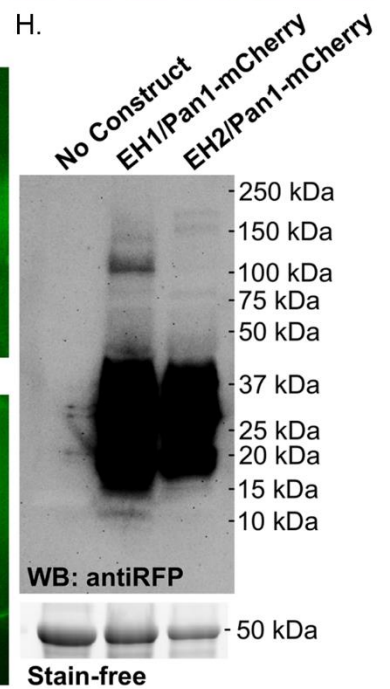

**Supplementary Figure 3. AtEH/Pan1 localizes to autophagosomes where it is able to recruit other subunits of the TPLATE complex. A-F.** Representative images of epidermal *N. benthamiana* cells transiently expressing AtEH/Pan1 fused to mCherry together with various other TPLATE complex subunits. **A-F.** In contrast to single infiltrations (A and D) where TWD40-1 and TWD40-2 localize to the cytoplasm upon over-expression in *N. benthamiana*, co-expression of AtEH1/Pan1-mCherry recruits the TWD40-1 and TWD40-2 subunits to the autophagosomes (B and E). Interestingly, AtEH2/Pan1-mCherry is only able to recruit TWD40-1 (C) but not TWD40-2 (F) onto the autophagosomes, indicating there is a mechanism of selectivity in the recruitment of different TPLATE subunits, and some subunits might require other subunits for their recruitment to the autophagosomes. Arrows in panels E and F point to either recruitment of TWD40-2 to AtEH1/Pan1 and to the absence of recruitment of TWD40-2 to AtEH2/Pan1. **G.** Strong vacuole labelling was found after pro-longed expression of AtEH/Pan-mCherry, indicating that these proteins are subject to vacuolar degradation. The signal is only detected in the red channel (570-625nm), but not in the blue (454-496nm) or the green channel (500-550nm), indicating that the signal does not originate from autofluorescence of dying cells (Scalebars equal 20  $\mu$ m). **H.** Western blot analysis of total protein extract from *N. benthamiana* expressing EH/Pan1-mCherry after 7 days shows that protein is still present but heavily degraded.

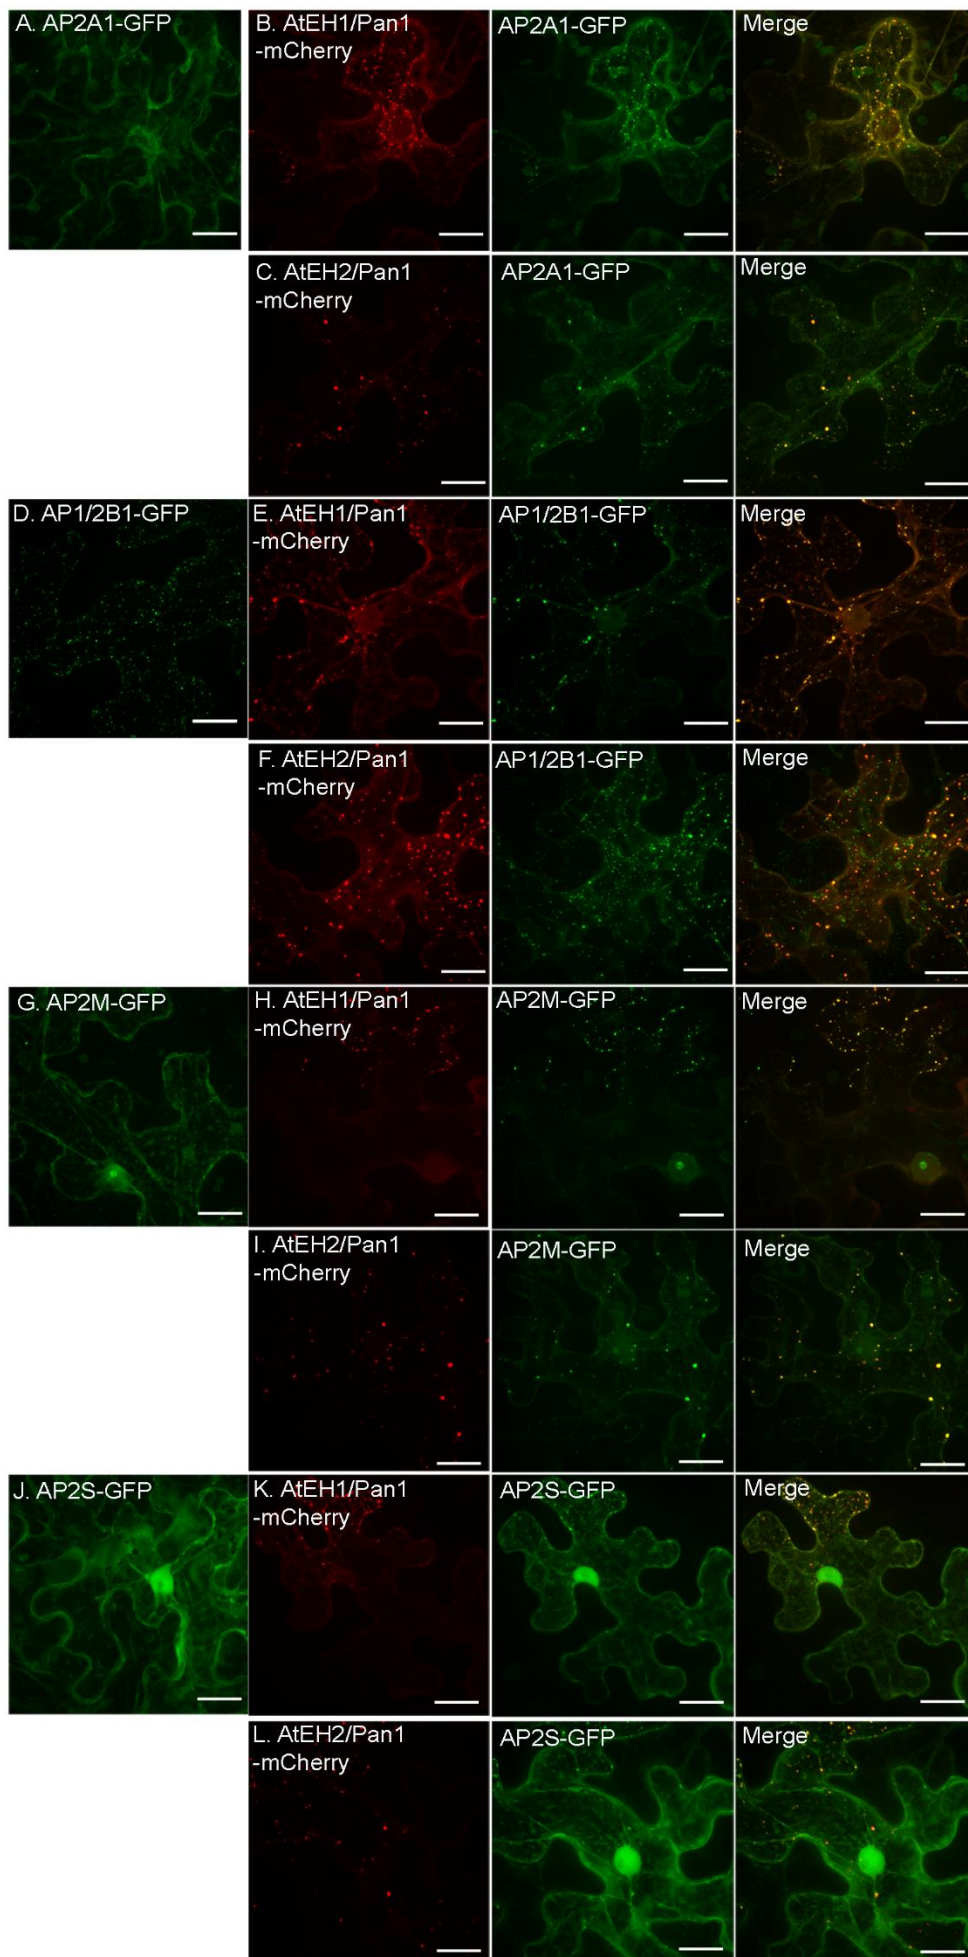

**Supplementary Figure 4. AtEH/Pan1 recruit subunits of the AP-2 complex onto the autophagosomes. All of the AP-2 subunits were recruited to the AtEH/Pan1 positive autophagosomes. These includes AP2A1 (A-C), AP1/2B1 (D-F), AP2M (G-I) and AP2S (J-L) (Scalebars equals 20  $\mu$ m).**



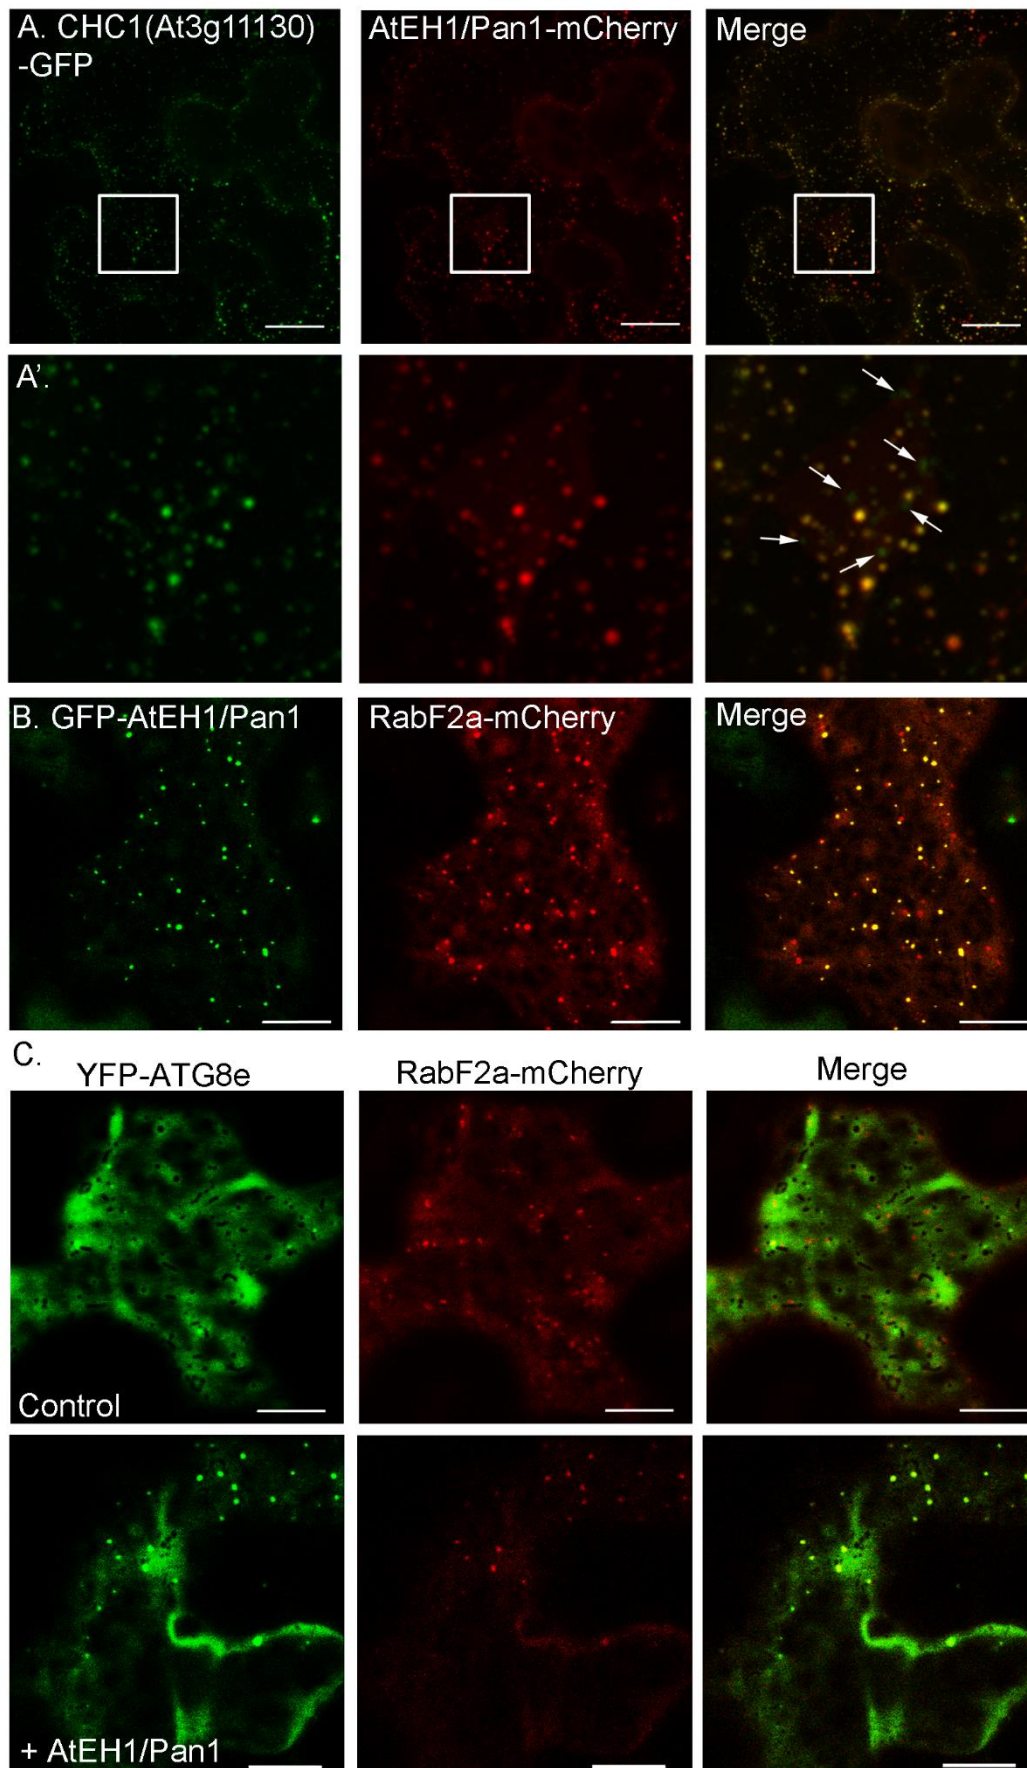

**Supplementary Figure 5. Strong co-localization is identified between AtEH/Pan1 and endosome markers.**  
**A-A'**. Clathrin heavy chain, CHC1, localizes to the TGN/EE (arrows) and also partially co-localizes with AtEH1/Pan1 positive autophagosomes (Scalebar equals 20  $\mu$ m). **B**. Similarly, strong co-localization is also observed between AtEH1/Pan1 and RabF2a-mCherry, a commonly used late endosomal marker. **C**. In cells transformed with the

autophagosome marker YFP-ATG8e and the late endosomal marker RabF2a-mCherry, hardly any autophagosomes can be observed. However, in the presence of AtEH1/Pan1, strong co-localization between ATG8e and RabF2a is observed (Scalebar equals 10  $\mu\text{m}$ ).

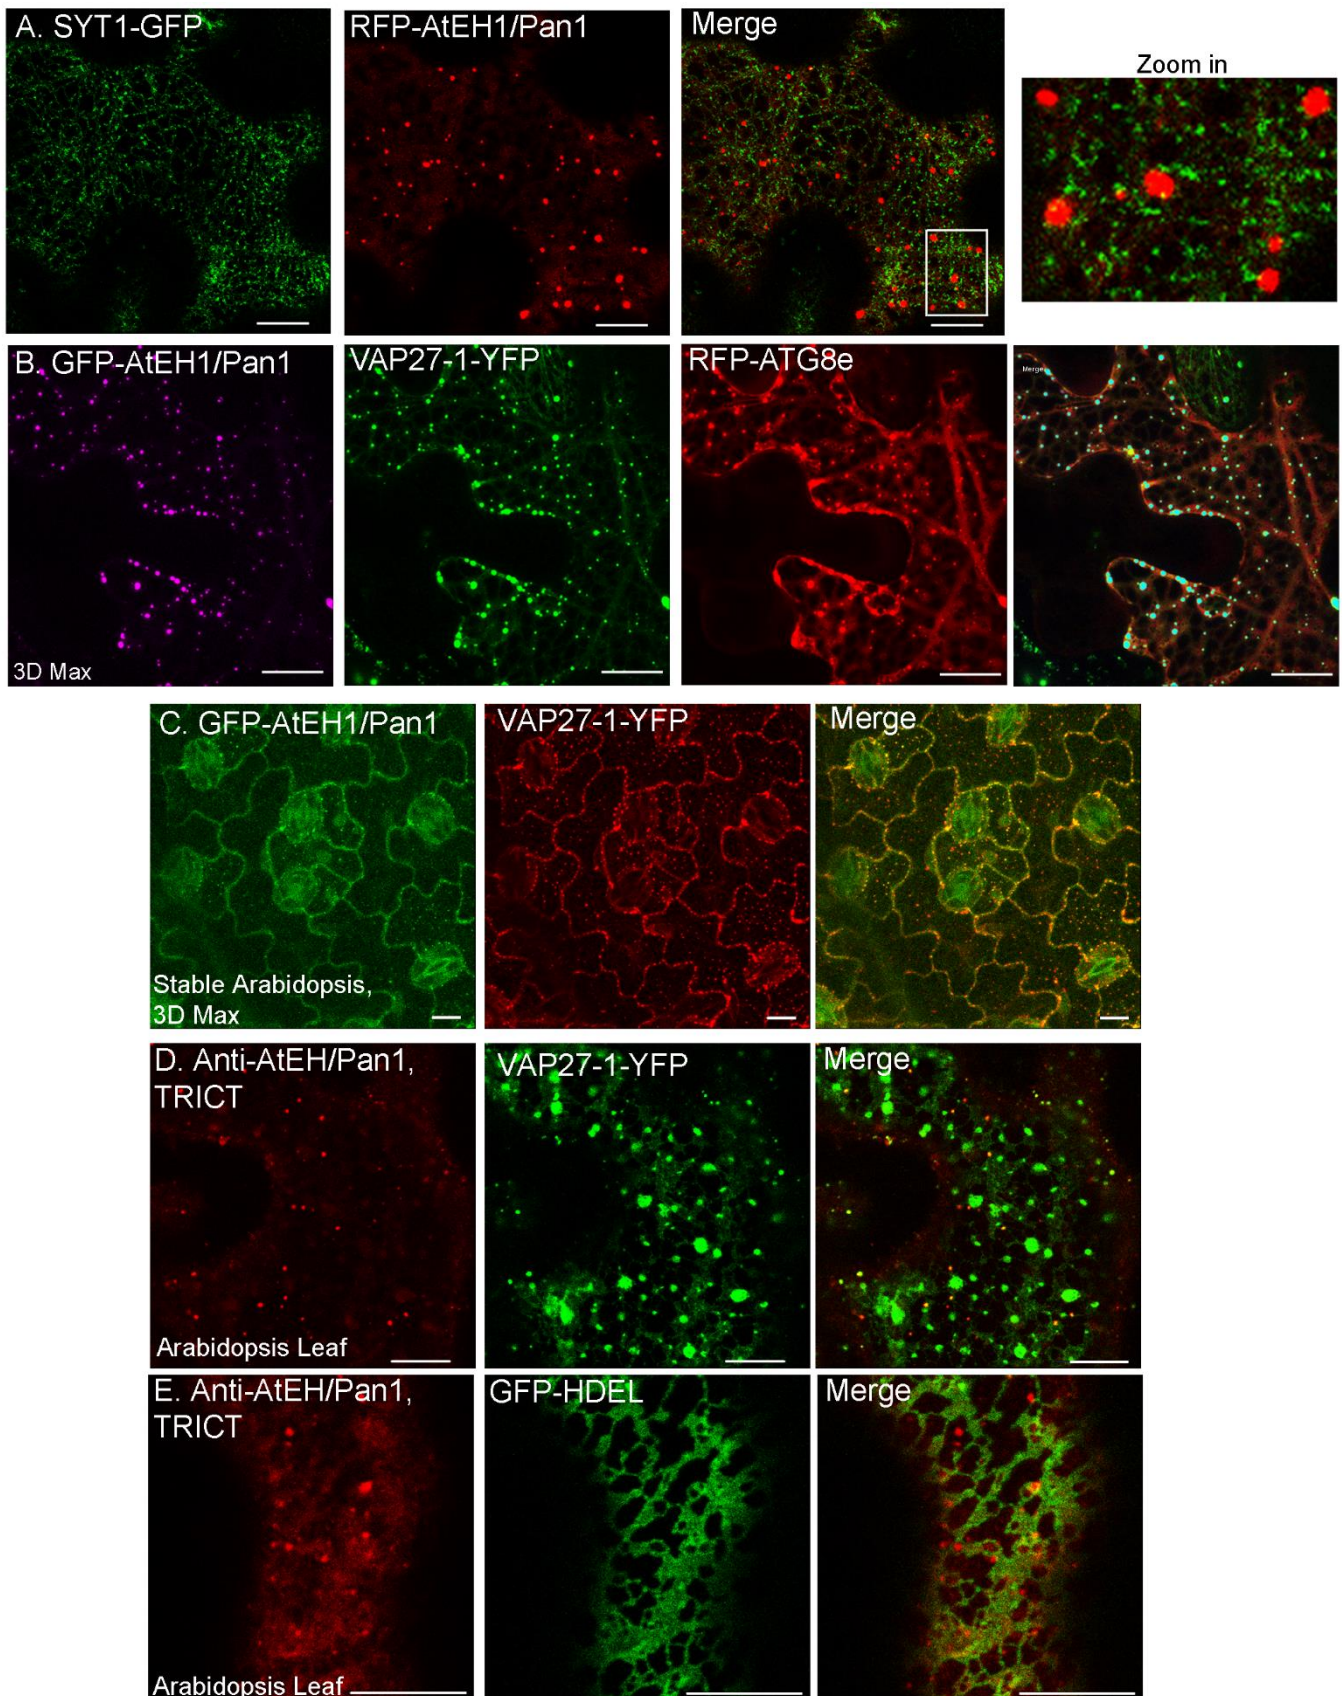

**Supplementary Figure 6. AtEH1/Pan1 labelled autophagosomes are found at ER-PM contact sites. A.** Strong association but little co-localization is seen between RFP-AtEH1/Pan1 with another EPCS resident protein, SYT1-GFP when both are transiently co-expressed in *N. benthamiana*. **B.** Triple expression of GFP-AtEH1/Pan1, RFP-ATG8e and VAP27-1-YFP in *N. benthamiana* leaf epidermal cells, showing that the three proteins co-localize at the same structures. **C.** The association between AtEH1/Pan1 with EPCS was further confirmed using an Arabidopsis line

expressing VAP27-1-YFP and GFP-AtEH1/Pan1. AtEH1/Pan1 labelled autophagosomes are found to co-localise with VAP27-1 at the ER-PM contact sites. **D.** Similarly, immunofluorescence was performed using anti-AtEH/Pan1 in cells of a VAP27-1-YFP expressing Arabidopsis line. Endogenous AtEH/Pan1 was found to co-localize with VAP27 labelled EPCS. **E.** As a control, immunolocalization of anti-AtEH/Pan1 was performed in Arabidopsis plants expressing GFP-HDEL. Red punctate structures were found to be associated with the ER network, but did not co-localize with discrete punctae in the green channel, indicating that our labelling is specific (Scalebar equals 10  $\mu\text{m}$ ).

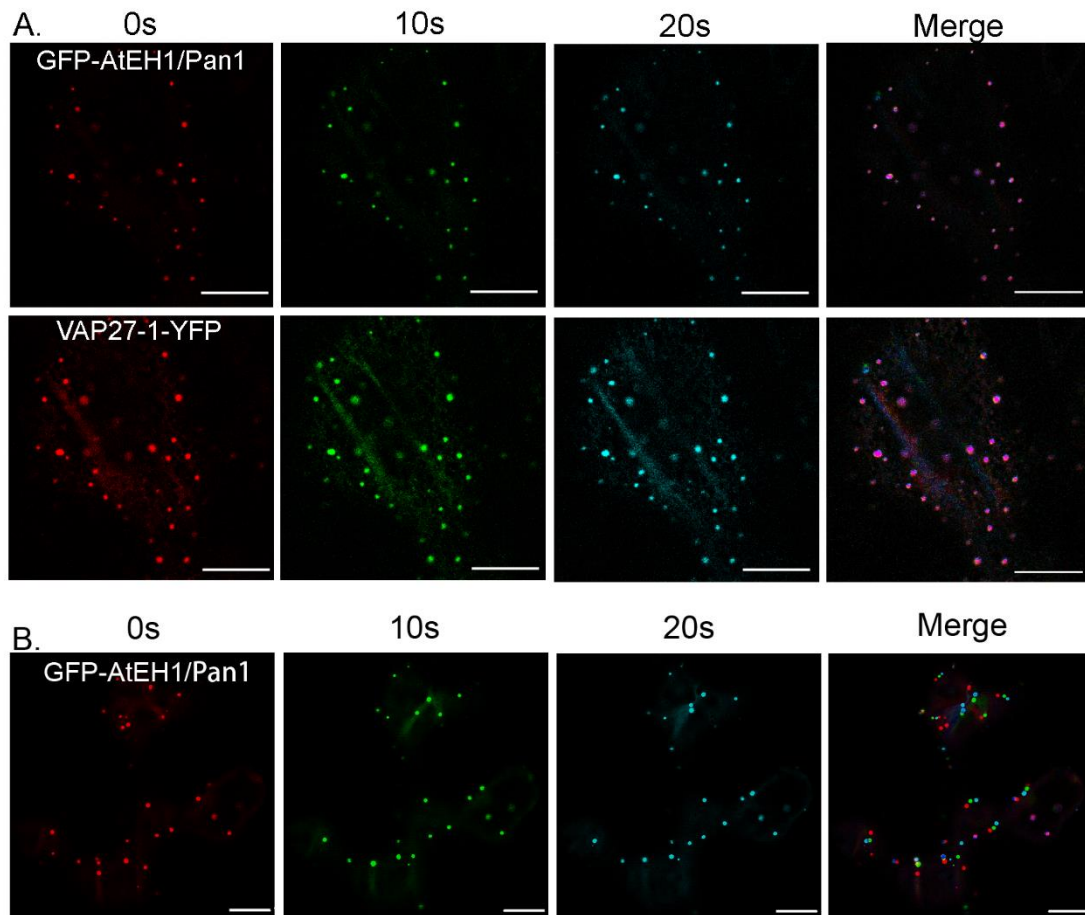

**Supplementary Figure 7. The ER-PM contact sites associated AtEH1/Pan1 autophagosomes are stationary.**

**A.** Time series of a cell co-expressing GFP-AtEH1/Pan1 and VAP27-1-YFP over 20 seconds. Each picture represents a time point and is pseudo-coloured to represent the different time frames; red (0 seconds), green (15 seconds) and cyan (30 seconds). The merged picture indicates that the punctae are persistent (magenta), indicating that EPCS and AtEH1/Pan1 puncta are stationary. **B.** In contrast, the majority of GFP-AtEH1/Pan1 labelled autophagosomes are much more mobile when VAP27-1 is not over-expressed (Scalebar equals 10 μm).

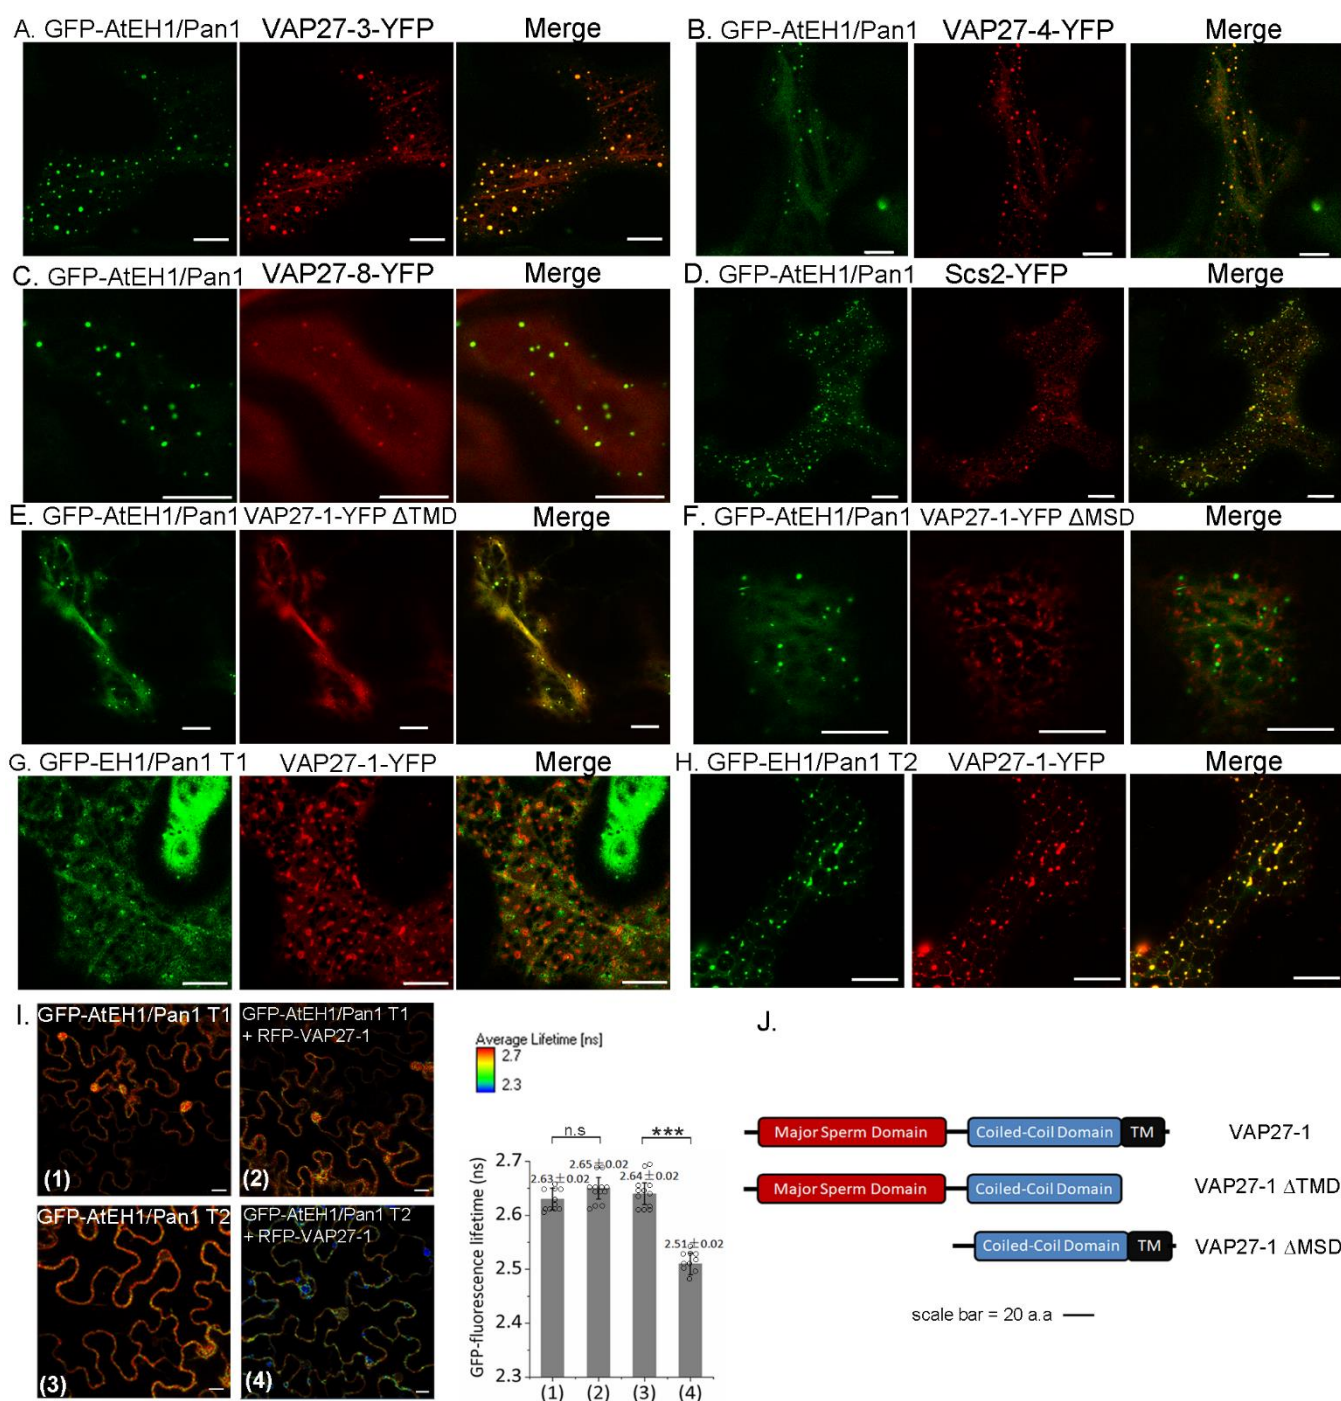

**Supplementary Figure 8. GFP-AtEH1/Pan1 co-localizes with multiple VAP27 proteins at punctate structures. A-H.**

Transient co-expression of AtEH1/Pan1 proteins together with members of the VAP family in *N. benthamiana*. Scalebars equal 10 μm. **A-B.** GFP-AtEH1/Pan1 co-expressed with two ER and EPCS localized VAP27 proteins, VAP27-3-YFP and VAP27-4-YFP. Strong co-localization is found at the EPCS. **C.** VAP27-8-YFP is also recruited to the GFP-AtEH1/Pan1 puncta when the two proteins are co-expressed. **D.** Similar co-localization is also found when a yeast homologue of VAP27, Scs2-YFP is used. **E-F.** GFP-AtEH1/Pan1 is co-expressed with two VAP27-1 truncations, VAP27-1 Δ TMD and VAP27-1 Δ MSD. Only VAP27-1 Δ TMD can to some extent be recruited to AtEH1/Pan1 puncta, indicating that the interaction between the two proteins requires the major sperm domain (MSD). **G-H.** On the other hand, when full length VAP27-1 is co-expressed with either, GFP-AtEH1/Pan1-T1 or GFP-AtEH1/Pan1-T2, only the C-terminus of

AtEH1/Pan1 is able to co-localize with VAP27-1, suggesting the interaction requires the C-terminal sequence in AtEH1/Pan1. **I.** Using FRET-FLIM, only the lifetime of GFP-AtEH1/Pan1 T2 is significantly reduced when combined with RFP-VAP27-1, indicating interaction between VAP27 and the C-terminal domain of AtEH1/Pan1. The fluorescence life-time of the GFP-AtEH1/Pan1 T1 or T2 (donor only control) is on average  $2.63 \pm 0.02$ ns and  $2.64 \pm 0.02$ ns, respectively (1) and (3); the life-time of AtEH1/Pan1 T1 combined with RFP-VAP27-1 is  $2.65 \pm 0.02$ ns (2), and the life-time of AtEH1/Pan1 T2 combined with RFP-VAP27-1 is  $2.51 \pm 0.02$ ns (3). **J.** Schematic illustration of the various VAP27-1 mutants used in this study (Scalebars equal 10  $\mu$ m).  $N \geq 10$  for every FRET-FLIM analysis. Error bars are S.D., \*\*\* $P < 0.001$  in Student's T-test.

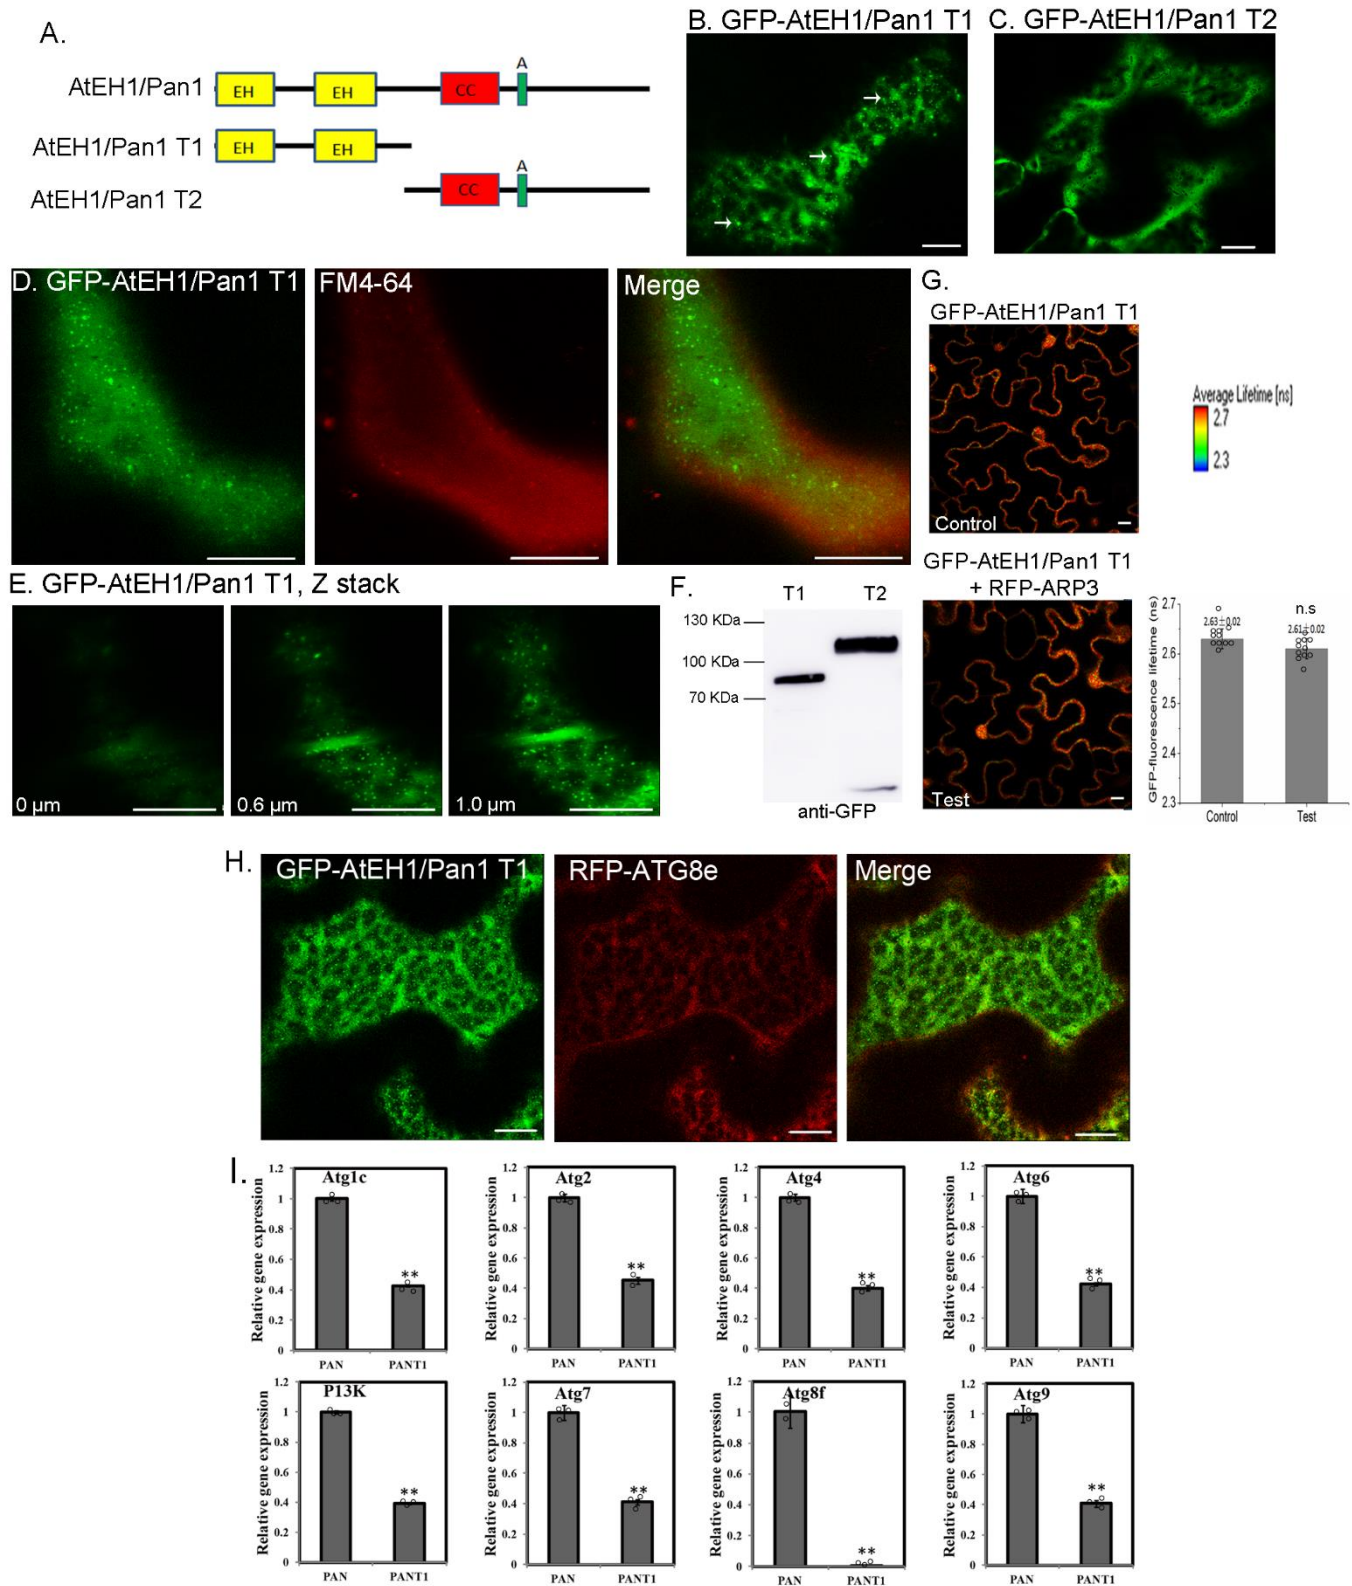

**Supplementary Figure 9. Expression of AtEH1/Pan1 domain deletion mutants does not induce autophagy.**

**A.** Schematic illustration of the different AtEH1/Pan1 truncations used in this study. **B and C.** When transiently expressed in *N. benthamiana*, the GFP-AtEH1/Pan1 T1 truncation (a.a.1-500, containing two EH domains) localizes to the cytoplasm and to punctae, likely endomembrane structures, while the AtEH1/Pan1 T2 truncation (a.a.474-1019, without EH domains) mainly localizes to the cytoplasm. **D.** GFP-AtEH1/Pan1 T1 localized to punctate structures that are found at the same focal plane as the FM4-64 labelled PM. **E.** Z-stack of a cell



expressing GFP-AtEH1/Pan1 T1 showing that the punctae reside close to the PM focal plane. **F.** Western-blot analysis of a *N. benthamiana* leaf extract expressing GFP-AtEH1/Pan1 T1 and T2 truncations showing that both proteins are made and stable **G.** Using FRET-FLIM, the fluorescence life-time of the GFP-AtEH1/Pan1 T1 donor protein is on average  $2.63 \pm 0.02$ ns, very similar to its lifetime when co-expressed with RFP-ARP3, indicating there is no interaction between these two proteins (Scalebars equal 10  $\mu$ m). **H.** Transient expression of GFP-AtEH1/Pan1 T1 truncation, does not induce the formation of autophagosomes in contrast to the full-length protein. The T1 construct mostly localizes to the cytosol as well as to small punctate structures without co-localization with ATG8. **I.** Moreover, autophagic activity in AtEH1/Pan1 T1 expressing cells, as measured by the relative expression of various ATG genes, is lower compared to the situation when the full-length protein is expressed.  $N \geq 11$  for every FRET-FLIM analysis. Error bars are S.D., n.s. = not significant,  $P > 0.05$ ,  $**P < 0.01$  in Student's T-test.

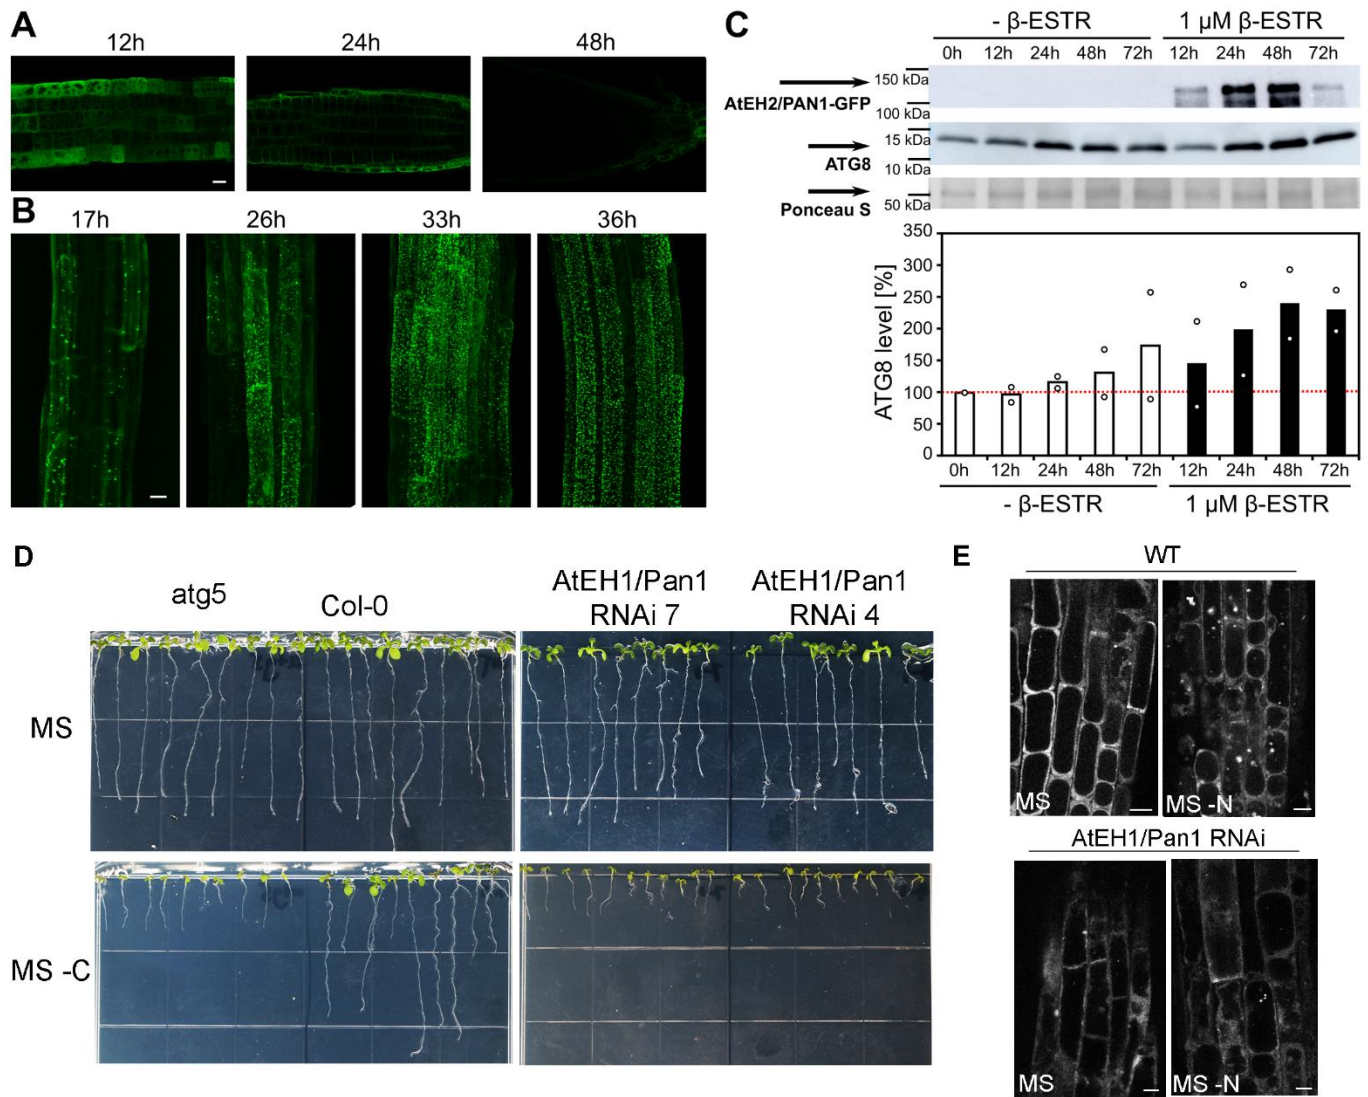

**Supplementary Figure 10. Induced over expression of AtEH2/Pan1 boosts autophagy. A and B.** Confocal images of root meristems (B) and maximum projections of root differentiation/maturation zone cells (C) of seedlings taken at the respective time points after transfer to Estradiol-containing medium. 12hrs post induction, clear cytoplasmic signal can be detected and the first autophagosomes appear in the differentiation/maturation zone. At 24hrs post induction, the signal in the meristem cells is predominantly membrane-associated and autophagosomes in the differentiation/maturation zone are clearly present up to 36hrs post induction. At 48hrs post induction, the signal in the meristem zone is strongly decreased. **C.** After induction by transfer, AtEH2/Pan1 protein is detected after 12 hours and increases up to 48hrs. ATG8 protein levels also increase up to 48hrs. ATG8 levels of transferred seedlings to non-induced and induced conditions are plotted using Ponceau S staining as normalization factor. The plot shows the average of two technical repeats of a typical result from at least two biological replicas (Scale bars equal 15  $\mu$ m). **D.** Two independent AtEH1/Pan1 RNAi lines show retarded root growth in nutrient depleted medium (MS -C) compared to the wild type plants. The autophagy deficient mutant, *atg5*, was used as a control to demonstrate the effectiveness of the starvation treatment. **E.** At normal growth conditions, autophagosomes (labelled by MDC) are rarely detectable in either WT or AtEH1/Pan1 RNAi mutant lines, however their number in WT plants was increased during nitrogen starvation, but not in AtEH1/Pan1 mutant (Scale bars equal 10  $\mu$ m).

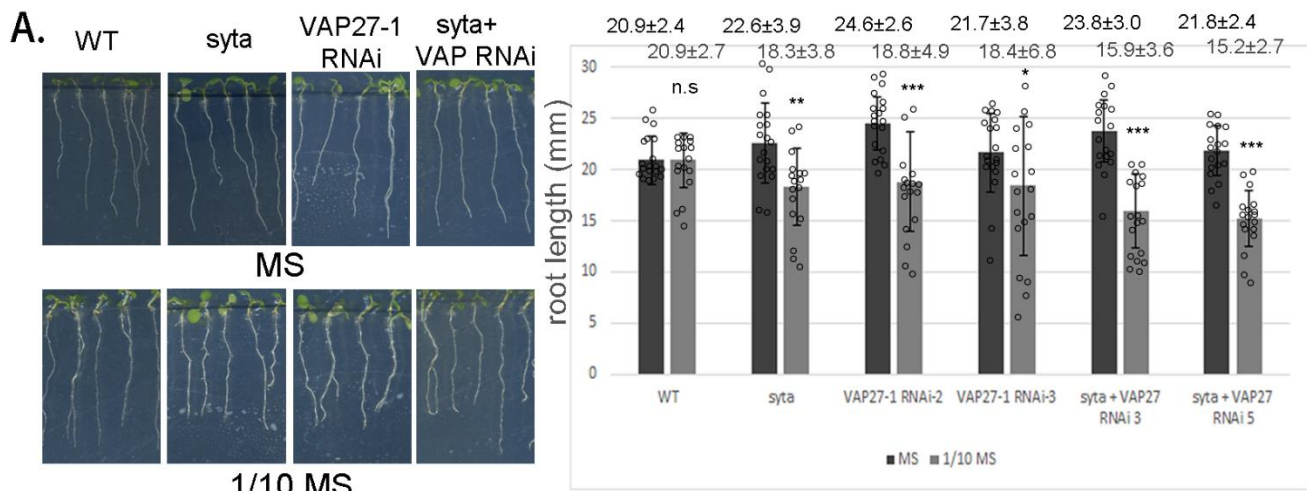

**B. VAP27P::VAP27-1-GFP**

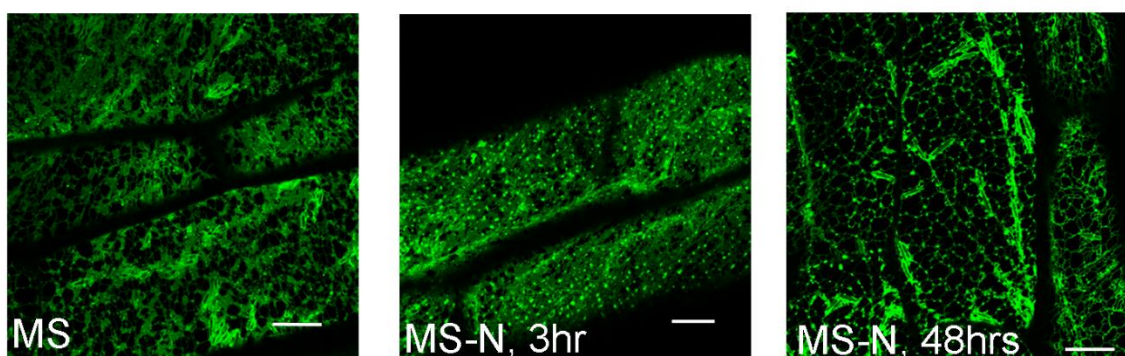

**Supplementary Figure 11. Plant ER-PM contact sites are involved in starvation induced autophagy. A.** Plants with knock-out or knock-down expression of EPCS genes are also defective in autophagy. Root growth in the *syta* mutant, VAP27 RNAi lines, and *syta* + VAP27 RNAi double mutant was analysed. Under low nutrient conditions (1/10MS), mutant lines showed reduced growth compared to their development in high nutrient conditions (MS), whereas little effect on growth was observed for wild type plants (n =19). **B.** In Arabidopsis hypocotyl cells, VAP27-1-GFP is mainly localized to the ER network, with some EPCS being labelled. Enhanced ER-PM contact site labelling of VAP27-1 is found when cells are starved for 3 hours, suggesting an enhanced ER-PM interaction is required when cells are under autophagic stress (Scalebars equal 10  $\mu$ m). Error bars are S.D., (\* P < 0.05, \*\* P <0.01, \*\*\* P <0.001 in Student's T-test).

Figure 4A

Figure 2G

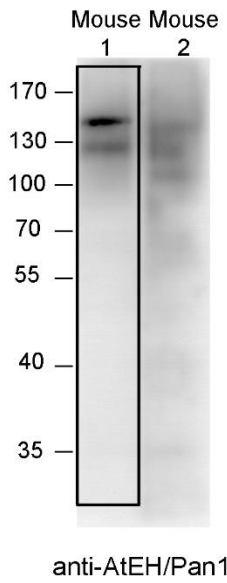

Figure 2H

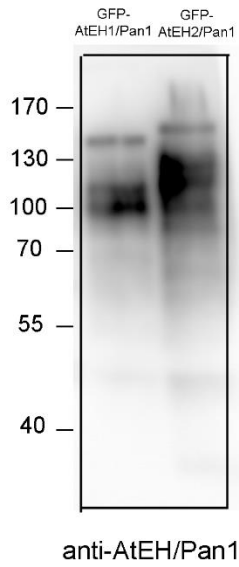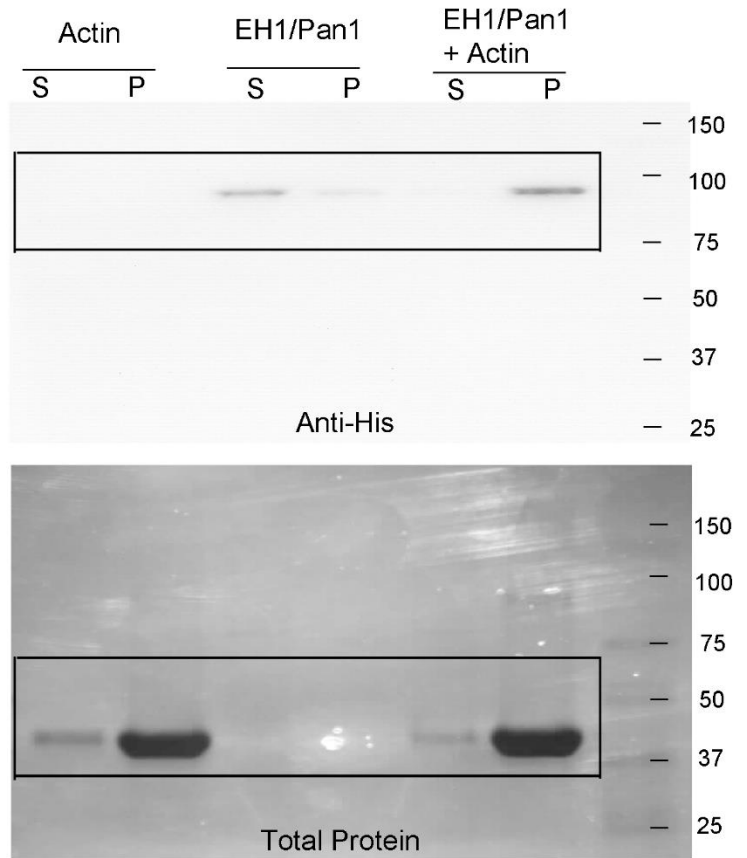

Figure 4J

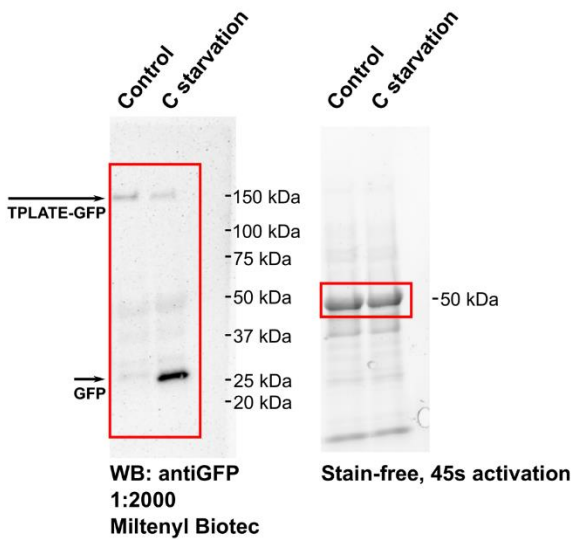

Figure 5H

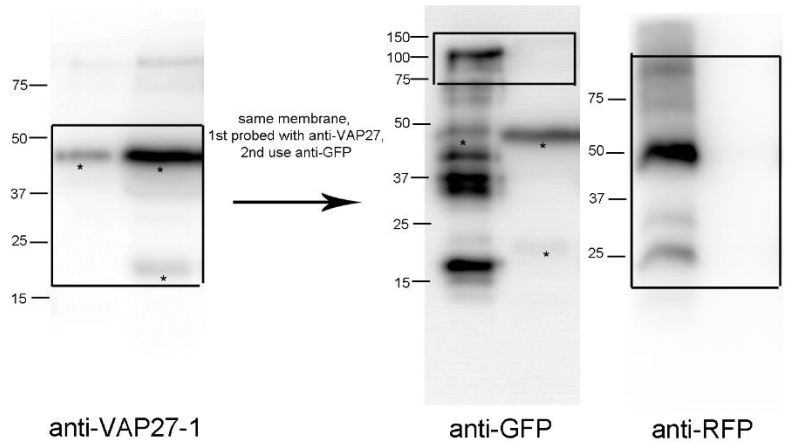

**Supplementary Figure 12. Uncropped blot images shown in Figure 2, Figure 4 and Figure 5.** Please note in figure 5H, the blot was first probed with anti-VAP27-1, and the same blot was used with different antibody. Protein bands labelled in asterisk are detected in the first experiment, and were also visible in the second experiment.

Figure S3H

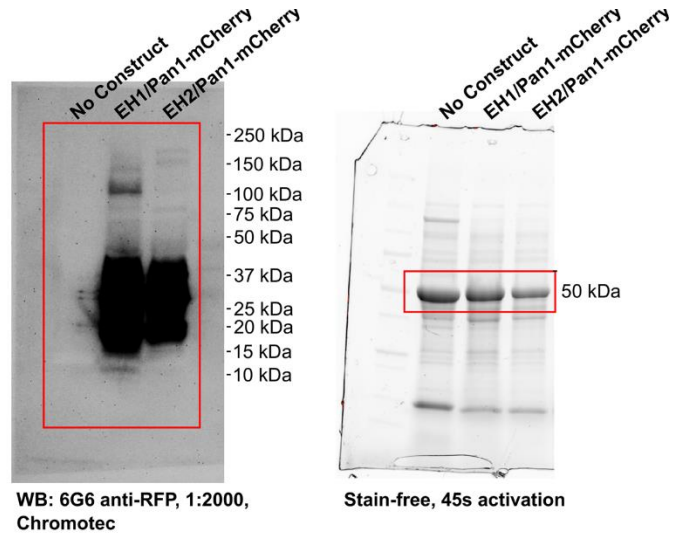

Figure 6D

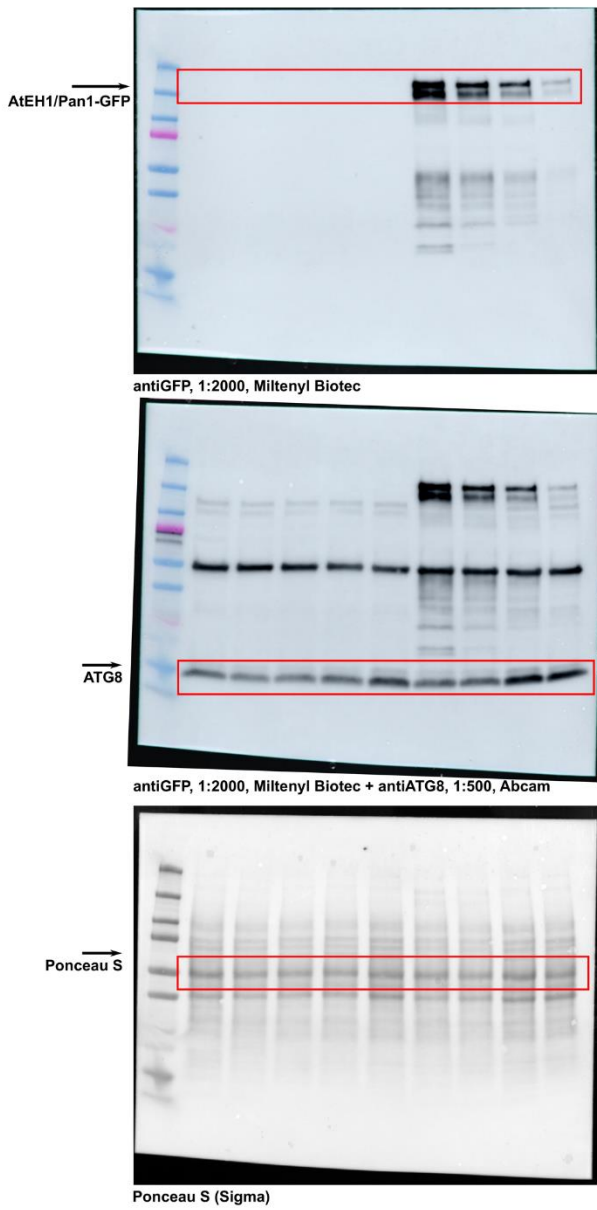

Figure S10C

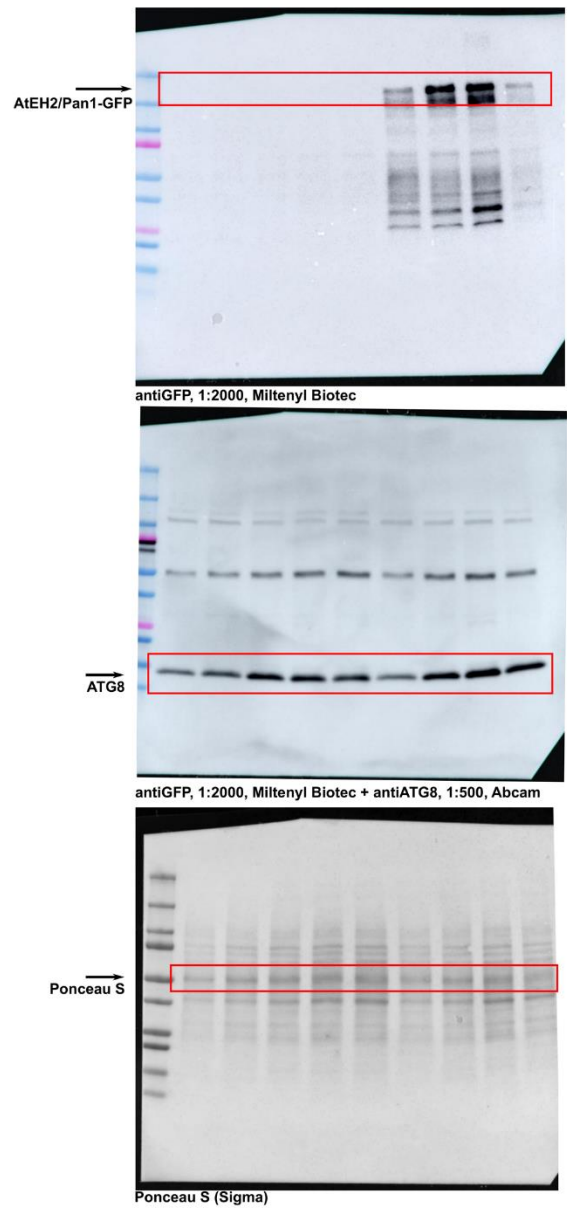

Supplementary Figure 13. Uncropped blot images shown in Figure 6, Figure S3 and Figure S10.

**Supplemental Table 1.** The list of primers used for cloning and genotyping

| Gene                      | F primer                                                            | R primer                                                      |
|---------------------------|---------------------------------------------------------------------|---------------------------------------------------------------|
| <i>AtEH1/Pan1</i>         | ggggacaagttgtacaaaaaagcaggcttcccgcc<br>ATGGCGGGTCAGAATCCTAAC        | ggggaccactttgtacaagaaagctgggtcCTAGGTCAG<br>ATAACTGGA ACTCCTTC |
| <i>AtEH2/Pan1</i>         | ggggacaagttgtacaaaaaagcaggcttcccgccAT<br>GGCAGCACCAAGGCCGA          | ggggaccactttgtacaagaaagctgggtcCTAGAAAGC<br>ATTCCAATTATCAGAAC  |
| <i>AtEH1/Pan1 T1</i>      | ggggACAAgTTTgTACAAAAAAgCAgg<br>CTTCACCATGGCGGGTCAGAATCCT<br>AACATGG | ggggACCACTTTgTACAAgAAAgCTgggTCC<br>TAACCACTGCCAGGTTGAGGGC     |
| <i>AtEH1/Pan1 T2</i>      | GAATTCGCGGCCGCATGGGTGCGC<br>GGCCAATCA                               | GAG TGC GGC CGC CTA GAA GGA GTT<br>CCA GTT ATC                |
| <i>AtEH1/Pan1 GST</i>     | CAA CAG GAGCTC GCG GGT CAG<br>AAT CCT AAC AT                        | CAA CAG CTCGAG CTA GAA GGA GTT<br>CCA GTT ATC TGA C           |
| <i>AtEH1/Pan1 antigen</i> | CAACAGGCTAGCAGAAGCCCCTTTA<br>TGTTCGA                                | CAACAGAAGCTTCTAGAAAGCATTCCAA<br>TTATCAGAAC                    |
| mRuby3                    | GGGGACAAGTTTGTACAAAAAAGC<br>AGGCTCAatggtgtctaaggcgaagag             | GGGGACCACTTTGTACAAGAAAGCTGG<br>GTActgtacagctcgccatgc          |
| SALK_083997.1             | LP: TGCAGCAGAAATTGTTCTGG                                            | RP: ATGAGACCACCAGTTCCTGC                                      |
| LBal 1.3                  | ATTTTGCCGATTTCCGAAC                                                 |                                                               |

**Supplemental Table 2.** The list of primers used for real-time qPCR

| Species                        | Gene           | F primer                  | R primer                  |
|--------------------------------|----------------|---------------------------|---------------------------|
| Arabidopsis<br>Real-time       | <i>ACTIN1</i>  | CATCAGGAAGGACTTGTACGG     | GATGGACCTGACTCGTCATAC     |
|                                | <i>Pan1p</i>   | GTCGCTTTCTGATCGGTCAC      | TAGCAGCAGGATTAGGTCCG      |
|                                | <i>ATG7</i>    | TCTATGACCCGTGTCACCTT      | GAGGCTTGACCAACAAGAGA      |
|                                | <i>ATG8a</i>   | CAAGCTTGGAGCTGAGAAAG      | GCAACGGTAAGAGATCCAAA      |
|                                | <i>ATG8b</i>   | GAATCAAGCTTGGAGCTGAA      | TGTAGAGAAACCCGTCTTCG      |
|                                | <i>ATG8c</i>   | CTTTCAAGTTGGAACACCCA      | CATACACAAATTGCCCAACA      |
|                                | <i>ATG8d</i>   | TATGTTGTACGGAAGCGGAT      | AGAAACCCGTCTTCGTCTTT      |
|                                | <i>ATG8e</i>   | GTACCTTGTGCCATCAGACC      | AGGAAGCCATCTTCGTCTTT      |
|                                | <i>ATG8f</i>   | AGTACCTAGTCCCGGCTGAT      | AGGAAGAACATTGTCCACGA      |
|                                | <i>ATG8h</i>   | ATCTGCCAGACATGGAGAAG      | CAAAGAGAGCTTTGGATGGA      |
|                                | <i>ATG18a</i>  | TGTTTCTCAGGGTGTGGTT       | TGAGAGCGAAGCAAGCTATT      |
| N.<br>benthamiana<br>Real-time | <i>eIF4a</i>   | CCCAGAGAGGAAATACAGTG      | CAATAGACGGACCAGATTCCG     |
|                                | <i>NbATG1c</i> | TGGAAAGTCCCTCATCTGCACCTG  | GCCTGCCTACCTCAACCTTCTCAT  |
|                                | <i>NbATG2</i>  | GCAATTGGGCTTGGAGTGCAATTTG | CCTGTGCGGCATCTCTAGGTTGAT  |
|                                | <i>NbATG3</i>  | GGAAACTGACAATCTTATAG      | GACATCCTCAAGTACAAGC       |
|                                | <i>NbATG4</i>  | GGCGAAGCTGACTGGATACCTGTT  | ATCATCCTGCACGCCGACAATGTA  |
|                                | <i>NbATG6</i>  | ACCTGCGTAAAGGAGTTTGCTGAC  | AGAGCTTTGGTCCAACCTTCTCTGC |
|                                | <i>NbATG7</i>  | CCAGCAGTGGAAGCAGAAGGTCTT  | GCCACCGACTTCCCGTGTATCA    |
|                                | <i>NbPI3K</i>  | GCTGTGCTGGTTACTCCGTCATC   | ACTGACTTTCCGCTCCACCCATA   |
|                                | <i>NbATG8f</i> | GACAAGAAAAAGTATCTCGTG     | GTGTTTTCTCCACTGTAAGTAA    |
|                                | <i>NbATG9</i>  | TCCGGTGGATTTGCTGCTGTTCT   | ACATCGCTCCCTGTGGGTCAAG    |

**Supplemental Table 3.** List of published fluorescent protein (FP) markers used in this study

| <b>Name</b>              | <b>Details</b>                                         | <b>Reference</b>                      |
|--------------------------|--------------------------------------------------------|---------------------------------------|
| RFP-ATG8e                | FP marker for autophagosomes                           | Wang et al., 2016a                    |
| YFP-ATG8e                | FP marker for autophagosomes                           | Wang et al., 2016a                    |
| RFP-HDEL                 | FP marker for endoplasmic reticulum                    | Wang et al., 2014                     |
| YFP-Actin-Cb             | FP marker for actin cytoskeleton                       | Wang and Hussey, 2017                 |
| RFP-ARP3                 | A protein from ARP2/3 complex                          | Wang et al., 2016a                    |
| VAP27-1-YFP              | An ER-PM contact site resident protein                 | Wang et al., 2014                     |
| Scs2-YFP                 | Yeast homologue of VAP27-1                             | Wang et al., 2014                     |
| VAP27-3-YFP              | A protein from the VAP27 family; ER, EPCS localization | Wang et al., 2016b                    |
| VAP27-4-YFP              | A protein from VAP27 family; ER, EPCS localization     | Wang et al., 2016b                    |
| VAP27-8-YFP              | A protein from VAP27 family; PM localization           | Wang et al., 2016b                    |
| SYT1-GFP                 | An ER-PM contact site resident protein                 | Siao et al., 2016                     |
| RabF2a-mCherry           | FP marker for late endosomes                           | Geldner et al., 2009                  |
| 35S::AtEH1-Pan1-GFP      | FP marker for the AtEH1/Pan1 (At1g20760) TPC subunit   | Gadeyne et al., 2014                  |
| 35S::AtEH2/Pan1-GFP      | FP marker for the AtEH2/Pan1 (At1g21630) TPC subunit   | Gadeyne et al., 2014                  |
| 35S::TPLATE-GFP          | FP marker for the TPLATE (At3g01780) TPC subunit       | Van Damme et al., 2004                |
| UBQ10::YFP-ATG8a         | FP marker for autophagosomes                           | Ortiz-Morea, F. A. et al. (2016).     |
| UBQ10::mCherry-ATG8e     | FP marker for autophagosomes                           | Gift from Professor Yasin Dagdas      |
| 35S::NBR1-GFP            | FP marker for ubiquitinated proteins and aggresomes    | Dagdas et al., Elife 2018             |
| UBQ::3xHA-TagRFP-AtAtg8a | FP marker for autophagosomes                           | Gift from Professor S.P. Dinesh-Kumar |
