# Supplementary material for: Plant AtEH/Pan1 proteins drive autophagosome formation at ER-PM contact sites with actin and endocytic machinery
Source: PubMed Central journal article supplement (PMC6853982; doi:10.1038/s41467-019-12782-6), 2019-11-13
Supplement: 41467_2019_12782_MOESM3_ESM.pdf [file 41467_2019_12782_MOESM3_ESM.pdf]

## **Description of Additional Supplementary Files**

File Name: Supplementary Movie 1

Description: List of sequences used to generate the phylogenetic tree of Figure 1.

File Name: Supplementary Data 1

Description: Homotypic fusion of GFP-AtEH1/Pan1 labelled autophagosomes in leaf epidermal cells.
